# Supplementary material for: Diversity of Methane-Oxidizing Bacteria in Soils from “Hot Lands of Medolla” (Italy) Featured by Anomalous High-Temperatures and Biogenic CO2 Emission
Source: PubMed Central journal article supplement (PMC5158108; doi:10.1264/jsme2.me16087), 2016-09-17
Supplement: 31_369_s1.pdf [file 31_369_s1.pdf]

**Table S1** Sequence identity (%) values among the pmoA and amoA nucleotide sequences detected in this study.

|         | MD-41 | MD-51 | MD-92 | MD-11 | MD-53b | MD-58b | MD-105b | MD-32 | MD-2 | MD-8b | MD-42 | MD-5 | MD-3 | MD-9 | MD-1 | MD-103b | MD-47 | MD-57b | MD-5b | MD-14 |
|---------|-------|-------|-------|-------|--------|--------|---------|-------|------|-------|-------|------|------|------|------|---------|-------|--------|-------|-------|
| MD-41   | 100%  | 61%   | 61%   | 57%   | 59%    | 60%    | 59%     | 58%   | 58%  | 58%   | 58%   | 58%  | 63%  | 67%  | 66%  | 66%     | 65%   | 64%    | 63%   | 63%   |
| MD-51   | 61%   | 100%  | 94%   | 63%   | 66%    | 66%    | 67%     | 67%   | 67%  | 66%   | 66%   | 67%  | 69%  | 68%  | 69%  | 68%     | 70%   | 69%    | 68%   | 69%   |
| MD-92   | 61%   | 94%   | 100%  | 62%   | 66%    | 66%    | 67%     | 68%   | 67%  | 66%   | 67%   | 69%  | 68%  | 67%  | 67%  | 67%     | 69%   | 66%    | 66%   | 67%   |
| MD-11   | 57%   | 63%   | 62%   | 100%  | 67%    | 67%    | 67%     | 67%   | 66%  | 67%   | 66%   | 67%  | 68%  | 70%  | 70%  | 70%     | 70%   | 71%    | 70%   | 70%   |
| MD-53b  | 59%   | 66%   | 66%   | 67%   | 100%   | 99%    | 87%     | 86%   | 86%  | 86%   | 86%   | 86%  | 71%  | 72%  | 71%  | 72%     | 71%   | 72%    | 73%   | 72%   |
| MD-58b  | 60%   | 66%   | 66%   | 67%   | 99%    | 100%   | 87%     | 86%   | 86%  | 86%   | 85%   | 86%  | 71%  | 72%  | 72%  | 72%     | 72%   | 73%    | 73%   | 73%   |
| MD-105b | 59%   | 67%   | 67%   | 67%   | 87%    | 87%    | 100%    | 99%   | 97%  | 97%   | 96%   | 96%  | 71%  | 73%  | 72%  | 72%     | 73%   | 72%    | 72%   | 72%   |
| MD-32   | 58%   | 67%   | 68%   | 67%   | 86%    | 86%    | 99%     | 100%  | 98%  | 97%   | 97%   | 97%  | 72%  | 73%  | 72%  | 72%     | 74%   | 72%    | 72%   | 72%   |
| MD-2    | 58%   | 67%   | 67%   | 66%   | 86%    | 86%    | 97%     | 98%   | 100% | 98%   | 98%   | 98%  | 71%  | 73%  | 72%  | 72%     | 74%   | 71%    | 71%   | 72%   |
| MD-8b   | 58%   | 66%   | 66%   | 67%   | 86%    | 86%    | 97%     | 97%   | 98%  | 100%  | 99%   | 99%  | 71%  | 73%  | 72%  | 72%     | 73%   | 72%    | 72%   | 71%   |
| MD-42   | 58%   | 66%   | 67%   | 66%   | 86%    | 85%    | 96%     | 97%   | 98%  | 99%   | 100%  | 99%  | 72%  | 73%  | 72%  | 72%     | 74%   | 72%    | 72%   | 72%   |
| MD-5    | 58%   | 67%   | 67%   | 67%   | 86%    | 86%    | 96%     | 97%   | 98%  | 99%   | 99%   | 100% | 72%  | 73%  | 72%  | 72%     | 74%   | 72%    | 72%   | 72%   |
| MD-3    | 63%   | 69%   | 69%   | 68%   | 71%    | 71%    | 71%     | 72%   | 71%  | 71%   | 72%   | 72%  | 100% | 84%  | 83%  | 82%     | 87%   | 83%    | 83%   | 84%   |
| MD-9    | 67%   | 68%   | 68%   | 70%   | 72%    | 72%    | 73%     | 73%   | 73%  | 73%   | 73%   | 73%  | 84%  | 100% | 95%  | 95%     | 88%   | 87%    | 87%   | 88%   |
| MD-1    | 66%   | 69%   | 67%   | 70%   | 71%    | 72%    | 72%     | 72%   | 72%  | 72%   | 72%   | 72%  | 83%  | 95%  | 100% | 100%    | 89%   | 88%    | 88%   | 88%   |
| MD-103b | 66%   | 68%   | 67%   | 70%   | 72%    | 72%    | 72%     | 72%   | 72%  | 72%   | 72%   | 72%  | 82%  | 95%  | 100% | 100%    | 88%   | 88%    | 88%   | 88%   |
| MD-47   | 65%   | 70%   | 69%   | 70%   | 71%    | 72%    | 73%     | 74%   | 74%  | 73%   | 74%   | 74%  | 87%  | 88%  | 89%  | 88%     | 100%  | 89%    | 89%   | 90%   |
| MD-57b  | 64%   | 69%   | 66%   | 71%   | 72%    | 73%    | 72%     | 72%   | 71%  | 72%   | 72%   | 72%  | 83%  | 87%  | 88%  | 88%     | 89%   | 100%   | 100%  | 99%   |
| MD-5b   | 63%   | 68%   | 66%   | 70%   | 73%    | 73%    | 72%     | 72%   | 71%  | 72%   | 72%   | 72%  | 83%  | 87%  | 88%  | 88%     | 89%   | 100%   | 100%  | 99%   |
| MD-14   | 63%   | 69%   | 67%   | 70%   | 72%    | 73%    | 72%     | 72%   | 72%  | 71%   | 72%   | 72%  | 84%  | 88%  | 88%  | 88%     | 90%   | 99%    | 99%   | 100%  |

**Table S2** The matrix of similarities showing the Jaccard's coefficients calculated on the basis of T-RFLP profiles of the three soils collected at 0.6-, 0.7- and 2.5-m ground depths.

|         | 0.6-TCM | 0.7-TCM | 2.5-TCM |
|---------|---------|---------|---------|
| 0.6-TCM | 1.000   |         |         |
| 0.7-TCM | 0.905   | 1.000   |         |
| 2.5-TCM | 0.714   | 0.619   | 1.000   |
